# Supplementary material for: Quantitative genetic architecture of adaptive phenology traits in the deciduous tree, Populus trichocarpa (Torr. and Gray)
Source: PubMed Central journal article supplement (PMC7784687; doi:10.1038/s41437-020-00363-z), 2020-09-08
Supplement: 41437_2020_363_MOESM1_ESM.pdf [file 41437_2020_363_MOESM1_ESM.pdf]

## Supplementary Files

**Figure S1:** Climate variation between 1896 and 2019. Black dots represent monthly means, red and blue lines link the monthly means during the experiment scoring period.

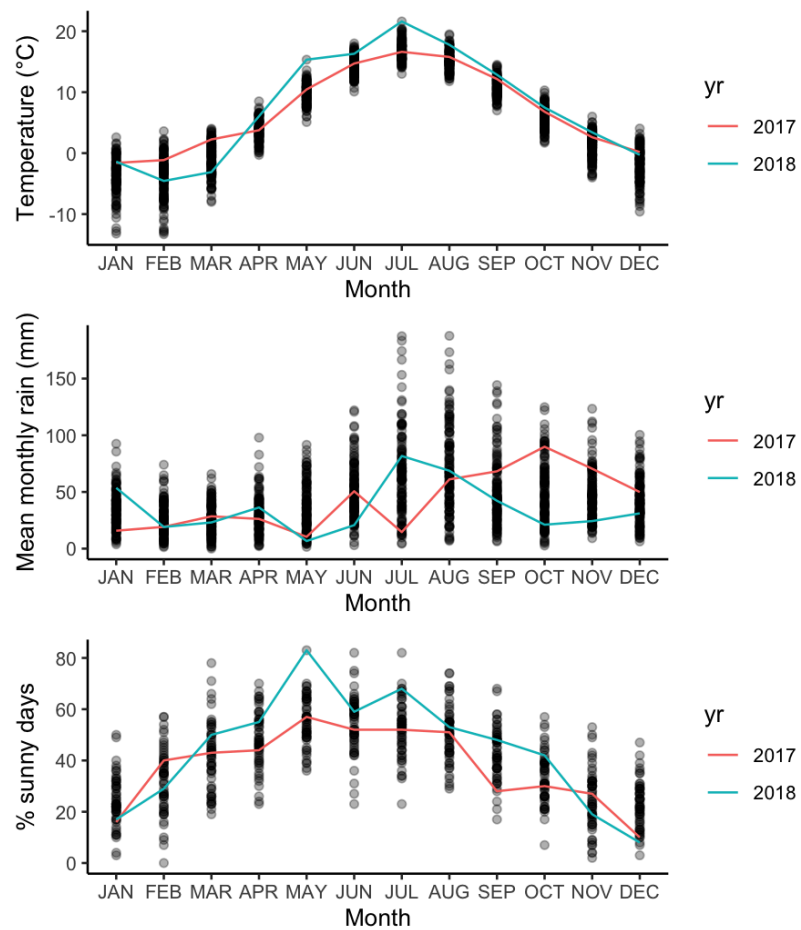

**Figure S2:** Smoothed fits used to extract transition dates (x axis) for developmental stages (y axis). Random individual trees are shown to illustrate the difference between smoothed/imputed data (orange) and raw data (red). Orange fit produce more reliable data and are used throughout the analyses.

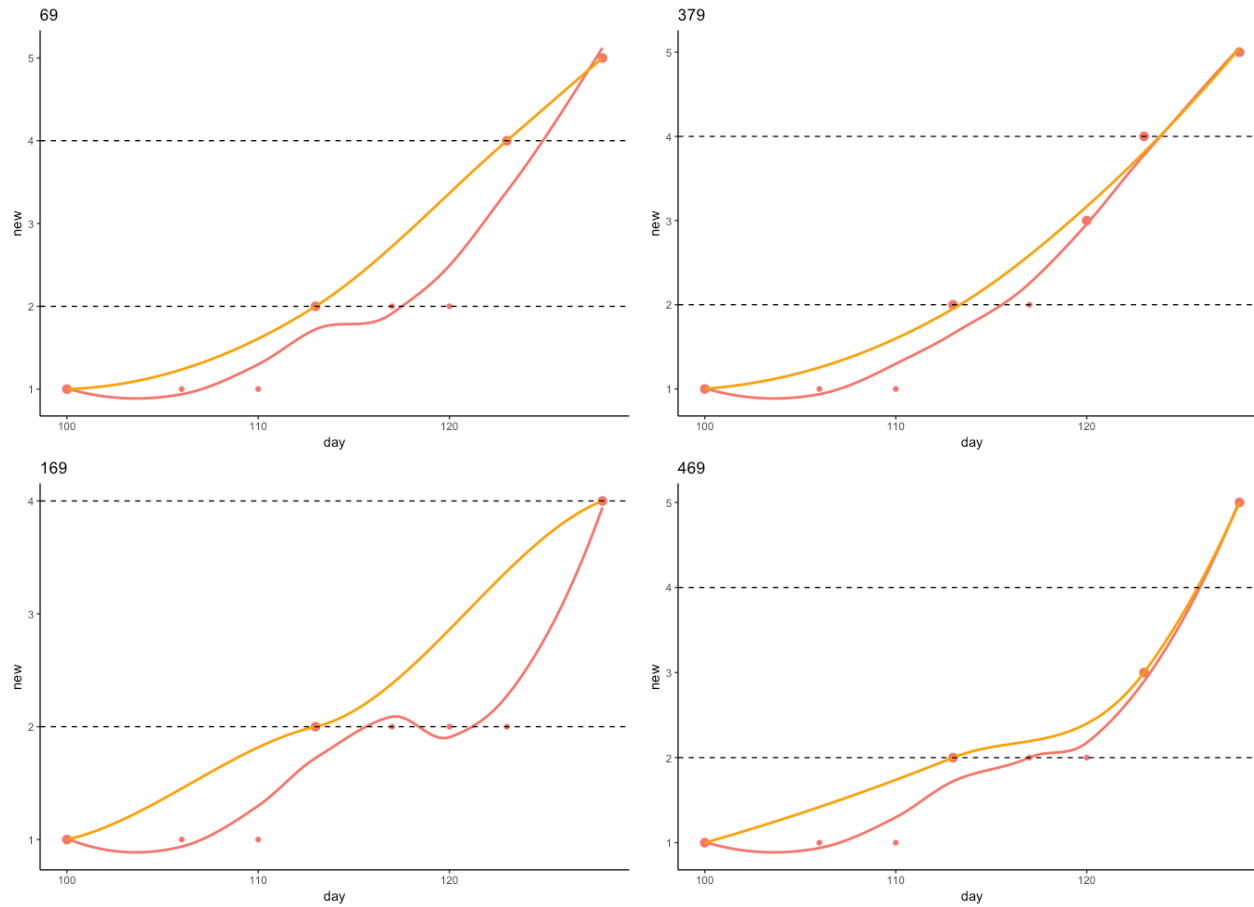

Table S1: Crossing scheme, and parental information for experimental trees

|                |                 | Fathers    |                |            |            |        |        |                        |             |                           |     |     |
|----------------|-----------------|------------|----------------|------------|------------|--------|--------|------------------------|-------------|---------------------------|-----|-----|
|                |                 | Region     | Alaska         |            | BC         | Idaho  | Oregon | Washington<br>x Oregon | Washington  | OP,<br>Koster,<br>Holland | -   |     |
| Mothers        | Lat (alt.)      | Klon       | 58°30'<br>(15) | 60°00'     | 49°15'     | 48°25' | 45°35' |                        | 45°50' (75) |                           |     |     |
| Region         | Lat (alt.)      | Klon       | <b>293</b>     | <b>278</b> | <b>193</b> | 214    | 159    | 236                    | <b>299</b>  | 187                       | 209 | 290 |
|                | 58°30'          | <b>216</b> |                |            | 5          |        | 1      |                        | 5           |                           |     | 5   |
| Alaska         | 59°20'<br>(500) | <b>291</b> |                |            |            |        |        | 2                      |             | 1                         |     |     |
|                | 60°37'<br>(400) | <b>265</b> | 3              | 3          |            | 1      |        |                        | 2           | 2                         |     |     |
| BC             | 49°00'          | <b>230</b> | 7              | 4          |            | 3      |        | 2                      | 6           |                           |     |     |
|                | -               | 96         |                |            |            |        |        |                        | 1           |                           |     |     |
| Idaho x Oregon | -               | 237        | 2              | 1          |            | 3      |        |                        | 3           | 1                         |     | 3   |
|                | -               | <b>240</b> |                | 4          |            |        |        | 1                      | 21          |                           | 2   |     |
| Oregon         | 44°30'          | 271        | 1              | 2          |            |        |        | 1                      | 4           |                           |     | 1   |
| -              |                 | 301        |                |            |            |        |        |                        |             | 2                         |     | 1   |
